# Supplementary material
Source: Springer Nature journal article supplement (https://www.springermedizin.de/resource/supplementary/12957_2011_900_MOESM3_ESM.pdf/9565726)

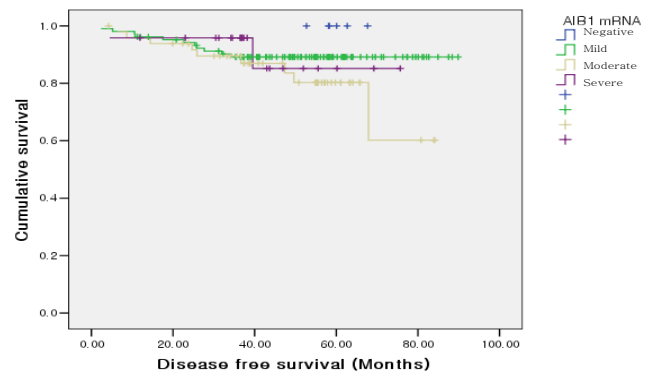

A.

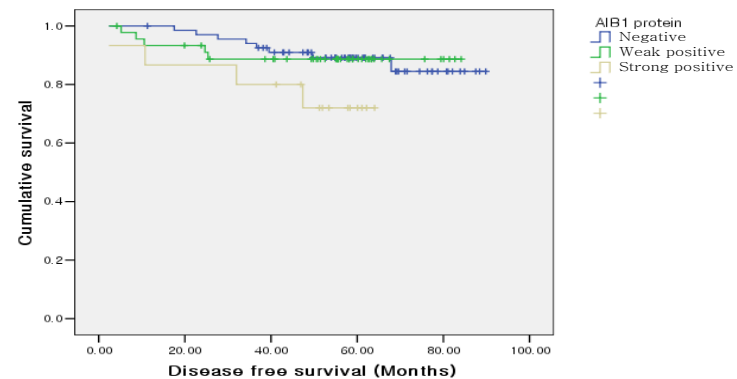

B.

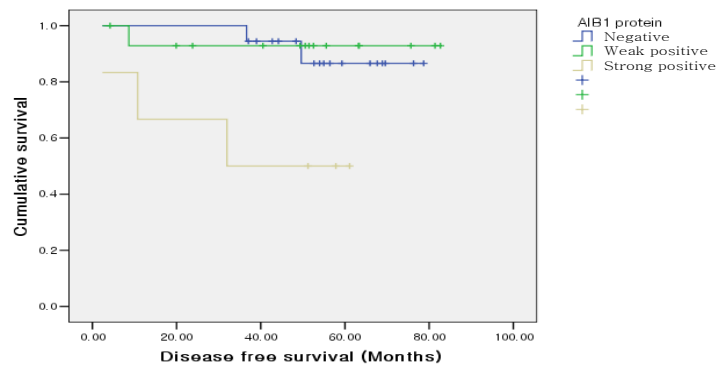

C.

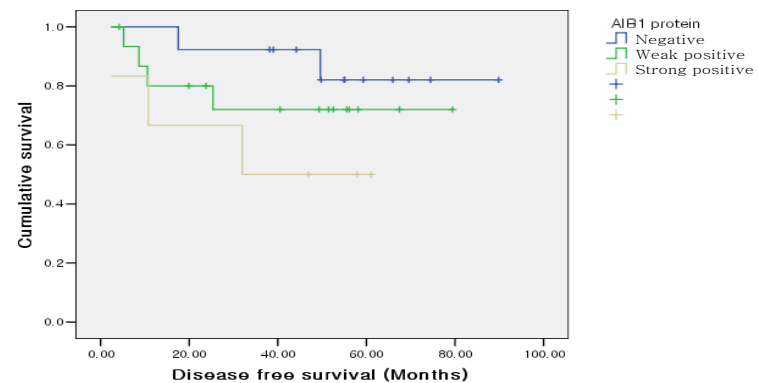

D.

Supplement: MOESM3 [file 9565726]
